# Supplementary material
Source: publisher site journal article supplement (https://www.dovepress.com/get_supplementary_file.php?f=497112.docx)
Supplement: Supplementary file 1 [file get_supplementary_file.php]

| **Supplementary Table 1: Reported ADRs for each type of event** | |
| --- | --- |
| **Events type** | **Reported ADRs** |
| **Cardiovascular** | Tachycardia, palpitation, hypertension, hypotension, bradycardia, QT prolongation, arrhythmia |
| **Dermatological** | Skin rash, redness, itching, Stevens-Johnson Syndrome, lupus erythematosus |
| **Renal** | Increase serum creatinine, blood in urine |
| **Hepatic** | Increase liver enzyme, jaundice, dark urine or stool |
| **Endocrine** | Hypoglycemia |
| **Gastrointestinal** | Nausea, vomiting, diarrhea |
| **Hematological** | Thrombocytopenia, anemia, agranulocytosis |
| **Immunological** | Anaphylactic reaction |
| **Neurological** | Seizure, headache, agitation, insomnia. |
| **Repiratory** | Shortness of breath, cough |
| **Musculoskeletal** | Muscle pain, joint pain, muscle rigidity |
| **Electrolyte disturbance** | Hypokalemia |
| **Others** | Ophthalmic ADR (burning sensations, blurred vision, and conjunctival oedema), Auditory, nonspecific such as weight gain or loss |

| **Supplementary Table 2: Detailed "Other" category per event on Reported ADRs for FQs** | | |
| --- | --- | --- |
| **Other categories** | **Number of events** | **Description** |
| Ophthalmic ADR | 7 | 1 (persistence and roughness around the eyes)  3 (burning sensation)  1 (Conjunctival edema)  2 (blurred vision) |
| Auditory | 0 |  |
| Nonspecific | 2 | 1 (Weight gain)  1 (Weight loss) |
